1           **Patterns of MHC-dependent sexual selection in a**  
2           **free-living population of sheep**

3           **“MHC-dependent sexual selection in Soay sheep”**

4           Wei Huang<sup>1\*</sup>, Jill G. Pilkington<sup>1</sup>, Josephine M. Pemberton<sup>1</sup>

5  
6  
7  
8  
9           <sup>1</sup> Institute of Evolutionary Biology, University of Edinburgh

10          \*Correspondence author : [wei.huang@ed.ac.uk](mailto:wei.huang@ed.ac.uk)

11  
12          Keywords : sexual selection, Major Histocompatibility complex, inbreeding avoidance, Soay  
13          sheep

14

## 15 **Abstract**

16 The MHC is one of the most polymorphic gene clusters in vertebrates and play an essential  
17 role in adaptive immunity. Apart from pathogen-mediated selection, sexual selection can also  
18 contribute to the maintenance of MHC diversity. MHC-dependent sexual selection could  
19 occur via several mechanisms but at present there is no consensus as to which of these  
20 mechanisms are involved and their importance. Previous studies have often suffered from  
21 limited genetic and behavioural data and small sample size, and were rarely able to examine  
22 all the mechanisms together, determine whether signatures of MHC-based non-random  
23 mating are independent of genomic effects or differentiate whether MHC-dependent sexual  
24 selection takes place at the pre- or post-copulatory stage. In this study, we use Monte Carlo  
25 simulation to investigate evidence for non-random MHC-dependent mating patterns by all  
26 three mechanisms in a free-living population of Soay sheep. Using 1710 sheep diplotyped at  
27 the MHC class IIa region and genome-wide SNPs, together with field observations of  
28 consorts, we found sexual selection against a particular haplotype in males at the pre-  
29 copulatory stage and sexual selection against female MHC heterozygosity during the rut. We  
30 also found MHC-dependent disassortative mating at the post-copulatory stage, along with  
31 strong evidence of inbreeding avoidance at both stages. However, results from generalized  
32 linear mixed models suggest that the pattern of MHC-dependent disassortative mating could  
33 be a by-product of inbreeding avoidance. Our results therefore suggest that while multiple  
34 apparent mechanisms of non-random mating with respect to the MHC may occur, some of  
35 them have alternative explanations.

36

## 37 **Introduction**

38 Major histocompatibility complex (MHC) genes encode cell surface proteins that present  
39 pathogen-derived peptide to T cells to activate the adaptive immune response and are one of  
40 the most variable loci across the vertebrate genome. Although pathogen-mediated balancing  
41 selection is believed to be the major force shaping MHC diversity, sexual selection could also  
42 contribute to the maintenance of MHC diversity (Jordan and Bruford 1998, Penn 2002,  
43 Milinski 2006, Radwan, Babik et al. 2020). A potential role for MHC-dependent sexual  
44 selection has been assessed theoretically (Ejsmond, Radwan et al. 2014) and documented in  
45 empirical studies (Winternitz, Minchey et al. 2013, Kamiya, O'Dwyer et al. 2014, Winternitz,  
46 Abbate et al. 2017). MHC-dependent sexual selection could act through both intrasexual  
47 selection via male-male competition and through intersexual selection including mate choice  
48 based on the partner's MHC constitution (additive benefits) or based on the MHC  
49 compatibility (non-additive benefits).

50 More specifically, MHC-dependent sexual selection could occur via three non-mutually  
51 exclusive mechanisms: selection could favour particular MHC alleles or haplotypes, MHC  
52 diversity or MHC compatibility. First, individuals with specific MHC alleles could be  
53 favoured by intrasexual or intersexual selection and such a pattern has been reported in  
54 several studies (Ekblom, Saether et al. 2004, Eizaguirre, Yeates et al. 2009). Second, some  
55 studies have reported that individuals with higher diversity or heterozygosity at the MHC  
56 were favoured as partners (Landry, Garant et al. 2001, Richardson, Komdeur et al. 2005,  
57 Cutrera, Fanjul et al. 2012, Winternitz, Promerova et al. 2015). Third, in terms of MHC  
58 compatibility, MHC-dependent disassortative mating has been reported, which could  
59 maximise the MHC diversity of offspring (Schwensow, Eberle et al. 2008, Setchell,  
60 Charpentier et al. 2010, Hoover, Alcaide et al. 2018, Han, Sun et al. 2019). Several studies

61 have also demonstrated that MHC genes could be a cue for kin recognition enabling  
62 avoidance of mating with relatives through MHC-associated odours (Grob, Knapp et al.  
63 1998, Penn 2002, Milinski 2006). However, as excessive expression of MHC molecules  
64 could lead to depletion of the mature T-cell repertoire and elevated risk of autoimmune  
65 disease (Migalska, Sebastian et al. 2019), it has also been suggested that individuals may  
66 optimise rather than maximise MHC diversity (Reusch, Haberli et al. 2001, Griggio, Biard et  
67 al. 2011, Rekdal, Anmarkrud et al. 2019). Fourth, some studies have found mate choice  
68 favouring MHC-similar mates and explained such patterns as local adaption to endemic  
69 pathogens (Bonneaud, Chastel et al. 2006, Bichet, Penn et al. 2014, Sin, Annavi et al. 2015).  
70 Finally, some studies have found no evidence of MHC-dependent sexual selection and  
71 suggested it may not be a universal phenomenon (Paterson and Pemberton 1997, Westerdahl  
72 2004, Huchard, Knapp et al. 2010, Sepil, Radersma et al. 2015, Yu, Nie et al. 2018).  
73 However, few previous studies have investigated all possible mechanisms together within the  
74 same study. A meta-analysis of MHC-dependent sexual selection in non-model species  
75 found support for female choice for MHC diversity and selection for dissimilarity when the  
76 MHC is characterized across multiple loci, but selection for particular MHC alleles was not  
77 examined (Kamiya, O'Dwyer et al. 2014). Therefore, more empirical studies are needed to  
78 draw definite conclusions about MHC-dependent sexual selection.

79 Future studies on MHC-dependent sexual selection would ideally include advances in a  
80 number of aspects of data quality. First, accurate estimates of relatedness should be examined  
81 at the same time as MHC-dependent sexual selection. Rather than being the actual cues for  
82 sexual selection, MHC variation could be incidentally associated with signals of genome-  
83 wide relatedness. Thus, signatures of MHC-dependent disassortative mating could be a by-  
84 product of inbreeding avoidance (Hurst, Thom et al. 2005, Sherborne, Thom et al. 2007). In  
85 the previous studies reported above (Bonneaud, Chastel et al. 2006, Setchell, Charpentier et

86 al. 2010, Huchard, Baniel et al. 2013, Bichet, Penn et al. 2014, Winternitz, Promerova et al.  
87 2015, Ferrandiz-Rovira, Allaine et al. 2016), relatedness was usually estimated from small  
88 panels of microsatellite markers rather than genome-wide SNPs, which may have been  
89 imprecise. Second, behavioural observations of mating are required to differentiate pre- and  
90 post-copulatory MHC-dependent sexual selection, especially since pre- and post-copulatory  
91 sexual selection on MHC genes could occur in opposite directions. For example, pre-  
92 copulatory sexual selection favouring MHC-dissimilar partners has been demonstrated in a  
93 population of salmon (*Salmo salar*) (Landry, Garant et al. 2001) while post-copulatory sexual  
94 selection favoured MHC-similar partners in another salmon study system (Yeates, Einum et  
95 al. 2009). However, few studies have examined whether MHC-dependent sexual selection  
96 occurs at the pre- and post-copulatory sexual selection stages using field observations of  
97 mating behaviour in the same population, except for a study of mouse lemur (*Microcebus*  
98 *murinus*)(Schwensow, Eberle et al. 2008). Third, detailed knowledge about MHC haplotype  
99 structure are needed to study MHC-dependent sexual selection. MHC loci genes are usually  
100 in strong linkage disequilibrium and inherited as haplotypes such that deviation of random  
101 mating based on MHC genes may be imprecisely measured without haplotype information.  
102 However, only a handful of studies in wild populations has managed to haplotype the MHC  
103 region (Huchard, Weill et al. 2008, Niskanen, Kennedy et al. 2014, Sin, Annavi et al. 2014,  
104 Gaigher, Burri et al. 2016) and few studies have investigated MHC-dependent sexual  
105 selection using MHC haplotypes (Sin, Annavi et al. 2015). Finally, larger sample sizes are  
106 essential in future studies to secure confident results (Kamiya, O'Dwyer et al. 2014, Hoover  
107 and Nevitt 2016, Winternitz, Abbate et al. 2017). A recent study documented the impact of  
108 sample size on error rates and effect sizes and suggested a sample size of 500 mating pairs is  
109 required for testing MHC-dependent sexual selection (Hoover and Nevitt 2016) which was  
110 not always available in previous studies.

111 In this study, we used a free-living population of Soay sheep (*Ovis aries*) on the island of  
112 Hirta, St Kilda to investigate MHC-dependent sexual selection. An individual-based study  
113 has been carried out on the population since 1985 (Clutton-Brock and Pemberton 2004). A  
114 large number of male-female consorts has been recorded during the rut each year and a multi-  
115 generation pedigree including most study individuals has been constructed. Previous studies  
116 have suggested intensive male-male competition and male mate choice in Soay sheep  
117 (Preston, Stevenson et al. 2003, Preston, Stevenson et al. 2005). Also, selection on load and  
118 tolerance of gastrointestinal parasites has been demonstrated (Hayward, Wilson et al. 2011,  
119 Hayward, Nussey et al. 2014). Therefore, we assume there could be MHC-dependent sexual  
120 selection to increase an offspring's fitness to better combat parasites. However, a previous  
121 study using five MHC-linked microsatellite loci genotyped in between 887 and 1209  
122 individuals born between 1985 and 1994 found no evidence for MHC-dependent assortative  
123 or disassortative mating in this population (Paterson and Pemberton 1997). Recently, using  
124 genotyping-by-sequencing, a total of eight MHC class II haplotypes have been identified in  
125 the study populations and a large number of individuals alive between 1989 and 2012 have  
126 been diplotyped (Dicks, Pemberton et al. 2019, Dicks, Pemberton et al. 2020). In addition,  
127 pairwise relatedness based on genome-wide SNPs is available between most individuals. This  
128 genetic and genomic data combined with a large number of consort and parentage records  
129 enabled us to test MHC-dependent sexual selection more thoroughly than before using Monte  
130 Carlo simulations. We aimed to test for specific mechanisms of MHC-dependent sexual  
131 selection by asking the following questions: 1) Are individuals carrying specific MHC  
132 haplotypes favoured during mating? 2) Are MHC-heterozygote individuals favoured during  
133 mating? 3) Is there MHC-dependent disassortative or assortative mating? 4) If there is  
134 disassortative mating, is it based on haplotype divergence? 5) Is there inbreeding preference  
135 or avoidance? 6) If any signature of non-random mating is detected, does it occur at the pre-

136 or post-copulatory stage? 7) If there is any signature of MHC-based mating, is this signature  
137 independent of genome-wide heterozygosity or relatedness?

## 138 **Methods**

### 139 **Study population and data collection**

140 An unmanaged population of Soay sheep has resided unmanaged on the island of Hirta, St  
141 Kilda since 1932 when they were introduced there from the nearby island of Soay. From  
142 1985, a longitudinal individual-based study has been conducted on the sheep resident in the  
143 Village Bay area of Hirta. Nearly all individual Soay sheep living in the study area have been  
144 followed from birth, through all breeding attempts, to death. Lambs born as singletons, twins  
145 or (rarely) triplets are ear tagged shortly after birth in April or May, sampled for genetic  
146 analysis and weighed. Any missed lambs or immigrant adults are captured, tagged and  
147 sampled in an August catch up or in the rut in November. The population is regularly  
148 censused throughout the year with individual locations recorded (Clutton-Brock and  
149 Pemberton 2004).

150 A large number of study area sheep alive since 1989 have been genotyped on the Illumina  
151 Ovine 50K SNP array. Parentage was determined for each individual using a subset of 315  
152 unlinked SNPs derived from the SNP array using the R library Sequoia (Berenos, Ellis et al.  
153 2014, Huisman 2017).

### 154 **Rut behavioural data**

155 Soay sheep have a promiscuous mating system with intensive male-male competition as well  
156 as male mate choice (Preston, Stevenson et al. 2003, Preston, Stevenson et al. 2005). The  
157 onset of the rut in early November is marked by increasing male aggression as males roam

158 and search for oestrous females across the study area. Males compete to gain access to  
159 oestrous females and the winner defends and mates with the female repeatedly over several  
160 hours in a so-called ‘consort’. However, only large and mature males with big horns can  
161 defend a female for long. Younger, smaller males and those with scurred horns constantly  
162 search for oestrous females, chase them and get quick matings if they can. Matings are  
163 mostly between males and females aged one year or older, but some male lambs aged seven  
164 months obtain matings and some female lambs give birth at the age of one (see  
165 Supplementary table 1). Throughout the rut the study area is continually monitored for  
166 consorts throughout each day, with consorts defined as being a close spatial relationship  
167 between a male and female with frequent male courtship and defence of a receptive female  
168 (Clutton-Brock and Pemberton 2004).

## 169 **Molecular data**

170 The molecular data used in this study included MHC class II diplotypes and pairwise  
171 genomic relatedness. We used a two-step haplotyping method involving characterisation of  
172 the MHC haplotypes present and then Kompetitive Allele-specific PCR (KASP) genotyping  
173 to impute haplotypes of individuals that lived in the study area between 1989 and 2012. First,  
174 seven expressed loci (DRB1, DQA1, DQA2, DQA2-like, DQB1, DQB2 and DQB2-like)  
175 within the MHC class IIa region were characterized in 118 Soay sheep using genotyping-by-  
176 sequencing which identified eight haplotypes named A to H (Dicks, Pemberton et al. 2019).  
177 Second, a panel of 13 SNPs located in the MHC class IIa region haplotypes including 11  
178 SNPs from the Ovine Infinium high density SNP array (Illumina) and two other SNPs located  
179 within DQA1 gene were selected to impute eight haplotypes using Kompetitive Allele-  
180 specific PCR (KASP) in 5951 Soay sheep (Dicks, Pemberton et al. 2020). After genotyping  
181 quality control and pedigree checking, 5349 individuals were successfully diplotyped. The



182 individual inbreeding coefficients and the pairwise genomic relatedness between all  
183 individuals were calculated using GCTA (Yang, Lee et al. 2011) and DISSECT respectively  
184 (Canela-Xandri, Law et al. 2015) based on 37K polymorphic SNPs from the Ovine 50K SNP  
185 array (Illumina). The X chromosome and chromosome 20 where the MHC genes are located  
186 were excluded when calculating the pairwise genomic relatedness.

## 187 **Assortative mating analysis**

188 We performed Monte-Carlo simulations to examine whether there were MHC-dependent or  
189 relatedness-dependent mating patterns in Soay sheep.

190 We first selected all females and males older than one year which were diplotyped at the  
191 MHC and genotyped on the SNP chip into a “primary mating pool”. We focused on mating  
192 between adult sheep because relatively few offspring have a juvenile parent (that is, a male  
193 lamb for a father and/or a female lamb for a mother; see Supplementary table 1) and  
194 including the large number of non-reproductive male and female lambs present each breeding  
195 season could have biased the simulations. We excluded individuals whose birth year was  
196 unknown, as they do not live mainly in our study area and we had no information about when  
197 they start to be involved in mating. For the few individuals with no recorded death year, death  
198 year was estimated from the last-seen year recorded in the census data or the last year they  
199 sired or gave birth to offspring. A total of 889 females and 821 males were included in the  
200 primary mating pool dataset and each of them is recorded once per year they were alive  
201 (Supplementary table 1).

202 Second, we extracted all the consorts between any male and female in the primary mating  
203 pool dataset as the “consort dataset”. Multiple observations of the same pair together on the  
204 same day were counted as one consort observation.

205 Third, we assembled an “observed parentage dataset” comprising all mother-father-offspring  
206 trios in which the offspring birth year was known and the parents were successfully  
207 diplotyped at the MHC and genotyped on the SNP chip. To be consistent between the  
208 primary mating pool and observed parentage dataset, we excluded trios in which either of the  
209 parents was a lamb or an adult not included in primary mating pool, such that all parents  
210 could be sampled from the primary mating pool. In total, 2068 trios were included in the  
211 observed parentage dataset (Supplementary table 2). Twins and triplets were not common in  
212 our dataset comprising less than a quarter of all individuals born. Twins are usually half-sibs  
213 with different fathers, coming from different mating events (Supplementary table 3). Thus,  
214 we treated each offspring as an independent data point. Finally, the null model of random  
215 mating (adjusted random mating model) was defined for simulation.

216 For each year, we first randomly assigned a male or a female living in the same year from the  
217 primary mating pool to replace each known mother and father in the observed parentage  
218 dataset and then adjusted the record of the sampled sheep based on the annual breeding  
219 success (number of offspring produced each year) of the replaced sheep to produce an  
220 “adjusted mating pool”. Then, each offspring in the observed parentage dataset was randomly  
221 assigned a father and mother in the year before its birth year without replacement from the  
222 adjusted mating pool. Annual breeding success in the simulated results was the same as the  
223 observed parentage dataset, while lifetime breeding success differed slightly from the  
224 observed parentage dataset with the mean of lifetime breeding success lower in the simulated  
225 data than that from the observed parentage dataset (Supplementary figure 1). The model was  
226 simulated for 10000 iterations in R v.3.5.2 using a custom script (R Core Team 2013).

227 Previous studies have suggested accounting for spatial distance when designing null models  
228 of random mating (Huchard, Baniel et al. 2013, Sepil, Radersma et al. 2015). However,  
229 during the rut, male sheep rove around the entire study area to search for oestrous females

230 such that there is little evidence of spatially-restricted mating patterns (Clutton-Brock and  
231 Pemberton 2004). Therefore, we did not account for spatial distance in our null models.

232 After simulation, we summarised the results of all the iterations using various indices in  
233 response to the questions we proposed: 1) The frequency of each haplotype in simulated  
234 mothers and fathers. 2) The ratio of homozygote: heterozygote in simulated mothers and  
235 fathers. 3) The average number of shared MHC haplotypes between simulated parents and the  
236 proportion of simulated parents sharing 0, 1 and 2 haplotypes. 4) To account for MHC  
237 functional variation, the pairwise divergence of MHC haplotypes between each simulated  
238 parent pair, which has been found to be associated with fitness and parasite resistance  
239 (Wakeland, Boehme et al. 1990, Lenz, Mueller et al. 2013, Pierini and Lenz 2018), was first  
240 measured by the proportion of the amino acid sequence that differed between them (*p*-  
241 distance) (Henikoff 1996). We then defined two indices AAdist and distmax as the mean and  
242 maximum MHC divergence between the 4 possible haplotype combinations of each  
243 simulated parent pair respectively. Finally, the mean of AAdist and distmax were calculated.  
244 5) The mean and median of genomic relatedness between simulated parents.

245 These indices were also calculated for the real data using the “consort dataset” and “observed  
246 parentage dataset”. Specifically, the first two indices were measured in mated females and  
247 males (consort dataset) or in mothers and fathers (observed parentage dataset) while the last  
248 three indices were measured between consort pairs or between genetic parents. For each  
249 index, statistical significance (*p* value) was determined by comparing the index in the real  
250 data with the 2.5% and 97.5% tails of the distribution of the index in the simulated results. To  
251 account for multiple testing, we applied a Bonferroni correction to the eight haplotype  
252 frequency tests across two sexes, and significant results were determined based on the refined  
253 critical *p*-value ( $p = 0.0015625$ ).

254 Once significant results were identified, we determined whether the distortion occurred at the  
255 pre- or post-copulatory stage based on the following logic. 1) If indices in the consort dataset  
256 and observed parentage dataset both deviate from expectations of random mating, this is  
257 evidence of pre-copulatory selection. 2) If indices in the consort dataset and observed  
258 parentage dataset both deviate from expectations of random mating but in opposite directions,  
259 or only indices in the consort dataset deviated, this is evidence of both pre- and post-  
260 copulatory selection acting in different directions. 3) If only indices in the observed parentage  
261 dataset deviate from expectations of random mating, this is evidence of post-copulatory  
262 selection. 4) If indices in the consort dataset and observed parentage dataset were both in line  
263 with expectations of random mating, this suggests no evidence of sexual selection.

## 264 **Generalized linear mixed models**

265 We used generalized linear mixed models to differentiate MHC and genomic effects on non-  
266 random mating. We drew up a matrix of all pairwise combinations of males and females in  
267 the primary mating pool in a given year. For each pair, we then recorded their consort and  
268 breeding success (0/1) based on the real data from consort dataset and observed parentage  
269 dataset respectively, with 0 meaning no successful consort or offspring observed and 1  
270 meaning consort or offspring observed. Then, we investigated consort and breeding success  
271 as response in separate binomial regressions. In each model, year and sire ID were fitted as  
272 random effects while genome-wide heterozygosity of each mother and father measured as  
273 inbreeding coefficient, MHC heterozygosity of each mother and father, genomic relatedness  
274 and the number of shared MHC haplotypes between each pair were fitted simultaneously as  
275 fixed effects. The model was run in R v.3.5.2 using R package lme4.

276

## 277 **Results**

### 278 **Haplotype frequency tests**

279 The frequency of haplotype C in both consort males and fathers was significantly lower than  
280 expected under the null model, even after Bonferroni correction. In addition, the frequency of  
281 haplotype G in both consort males and fathers and the frequency of haplotype H in fathers  
282 tended to be higher than expected but these results were not significant after Bonferroni  
283 correction (Figure 1).

284 We did not find any significant deviation of haplotype frequency in either consort females or  
285 mothers relative to random mating. The frequency of haplotype F and H in consort females  
286 tended to be lower and higher respectively. In addition, the frequency of haplotypes A and G  
287 in mothers tended to be lower and higher respectively. However, none of these patterns was  
288 significant after Bonferroni correction (Supplementary figure 2).

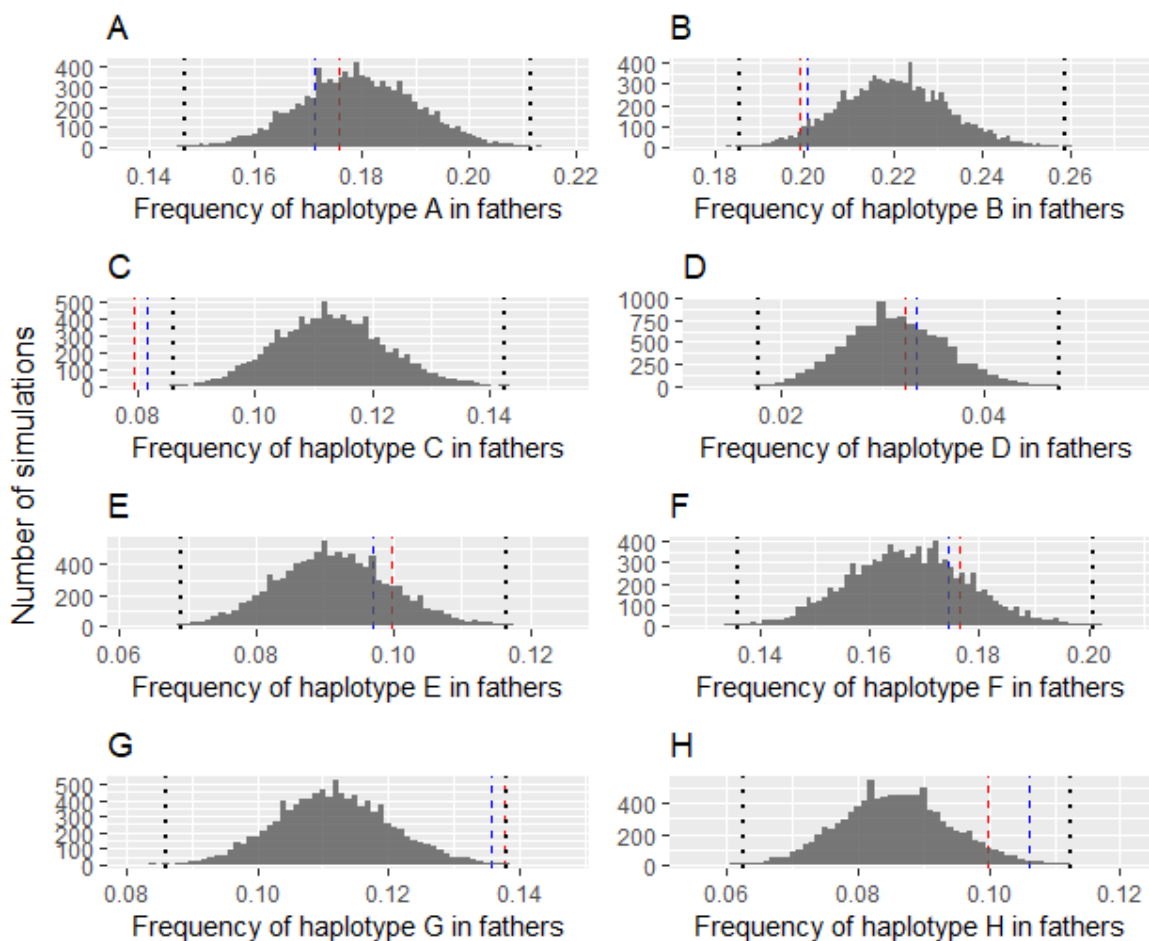

289

290 Figure 1. Results of MHC haplotype frequency tests in fathers following Monte Carlo  
291 simulation. Histograms represent the result of simulations with dotted black lines  
292 representing the critical p-values after Bonferroni correction. The red and blue dashed blue  
293 lines show the observed MHC haplotype frequency in the consort and observed parentage  
294 dataset respectively. Males carrying Haplotype C are rarer than expected in both the consort  
295 and parentage dataset.

## 296 **Diplotype-based tests**

297 Regarding individual MHC heterozygosity, we found that the ratio of homozygote to  
298 heterozygote in consort females was significantly higher than expected under the null model  
299 However, the ratio in mothers was in line with expectation under the null model (Figure 2a).  
300 We found the average number of shared haplotypes between parents was significantly lower  
301 compared with the null expectation, but this pattern was not observed in consort dataset  
302 (Figure 2c). In addition, the proportion of parents sharing 0 haplotype was significantly

303 higher than in the simulated results while the proportion of parents sharing 1 haplotype was  
304 significantly lower than the simulated results (Figure 2d-f). However, MHC divergence  
305 measured as amino acid sequence differences between parents was in line with expectation of  
306 random mating (Figure 2g and h).  
307

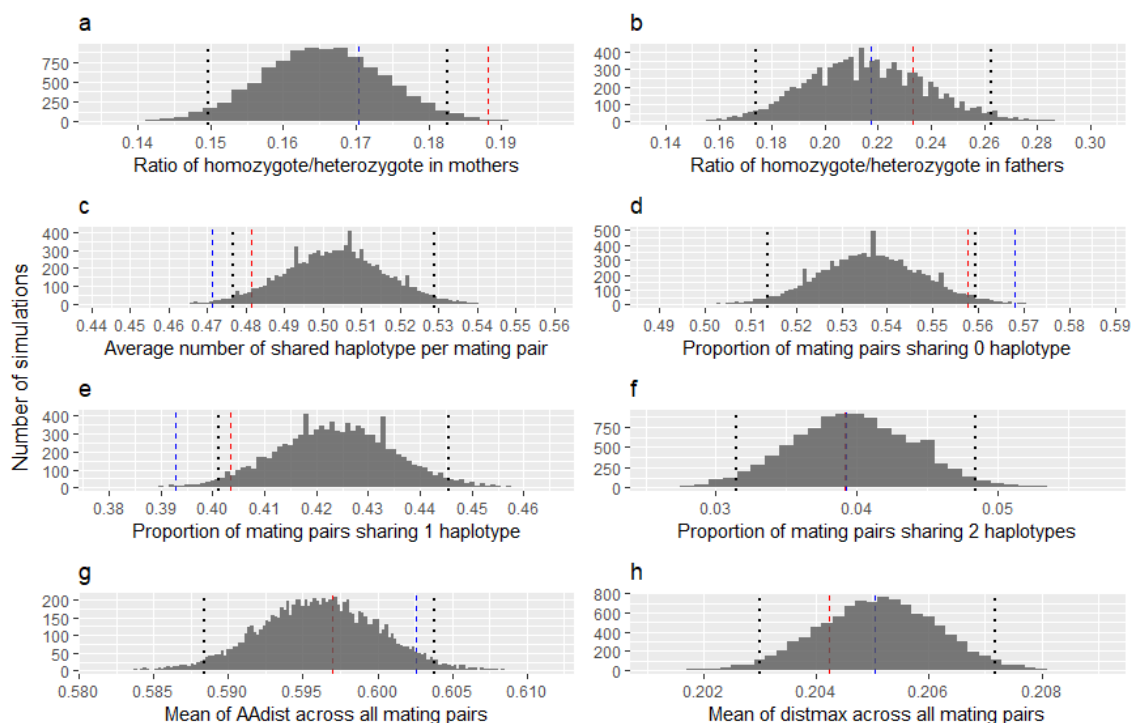

308  
309 Figure 2. Results of MHC diplotype-based tests following Monte Carlo simulation.  
310 Histograms represent the result of simulations, with dotted lines representing the 2.5% and  
311 97.5% tails of the distributions. The red and blue dashed blue lines show observed values for  
312 the indices in the consort and observed parentage datasets respectively. Homozygote females  
313 are commoner than expected in the consort but not the parentage dataset and parents share  
314 fewer haplotypes than expected.

### 315 **Genome-wide relatedness tests**

316 We found mean and median genomic relatedness between consort pairs and between parents  
317 were significantly lower than expected under the null model (Figure 3).

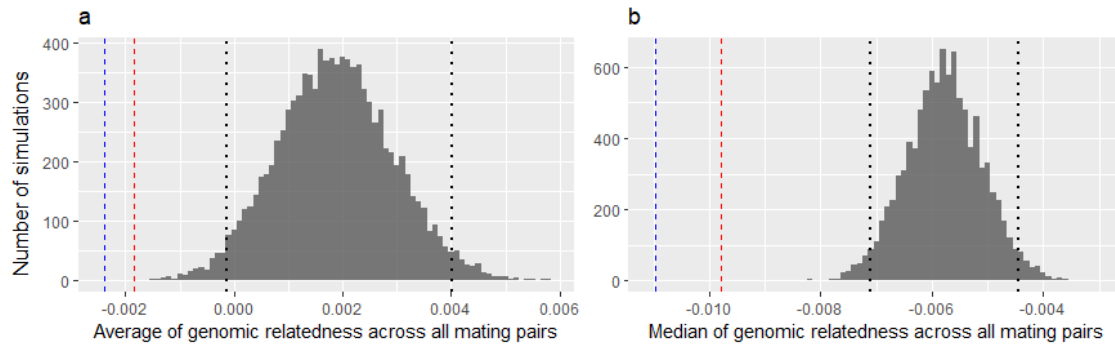

318

319 Figure 3. Results of tests of pairwise genomic relatedness following Monte Carlo simulation.  
320 Histograms represent the result of simulations, with dotted lines representing the 2.5% and  
321 97.5% tails of the distributions. The red and blue dashed blue lines show observed values for  
322 genomic relatedness in the consort and observed parentage dataset respectively. Partners are  
323 less related than expected in both the consort and the parentage datasets.

### 324 **Generalized linear mixed models**

325 We found a negative association between consort success and female MHC heterozygosity  
326 and positive associations between both consort and breeding success and male genome-wide  
327 heterozygosity measured as inbreeding coefficients. We found a negative association between  
328 both consort and breeding success and genomic relatedness, but no association between  
329 consort and breeding success and number of shared MHC haplotypes (Table 1).

330



331

332 Table 1. Results of generalized linear mixed model testing associations between  
333 consort/breeding success and MHC/genomic heterozygosity and relatedness. Significant  
334 effects and standard errors are marked with asterisk (\*  $p < 0.05$ , \*\* $p < 0.01$ ) and shown in  
335 brackets respectively.

|                                   | Consort Success   | Breeding success |
|-----------------------------------|-------------------|------------------|
| Fixed effects                     |                   |                  |
| MHC heterozygosity of mothers     | -0.154 (0.046)**  | -0.032(0.063)    |
| MHC heterozygosity of fathers     | -0.228 (0.217)    | -0.137(0.167)    |
| Inbreeding coefficient of mothers | 0.335 (0.671)     | -1.280(0.993)    |
| Inbreeding coefficient of fathers | -12.611 (2.093)** | -10.591(3.845)** |
| Number of shared MHC haplotypes   | -0.016 (0.031)    | -0.064(0.041)    |
| Genomic relatedness               | -1.125 (0.359)**  | -0.950(0.476)*   |
| Random effects                    |                   |                  |
| Sire ID                           | 3.822(1.955)      | 1.731(1.316)     |
| Year                              | 1.248(1.117)      | 0.359(0.599)     |

336

## 337 Discussion

338 In this study, we investigated MHC-dependent sexual selection in a free-living sheep  
339 population using Monte Carlo simulations. By comparing the result of simulated and real  
340 data, we examined whether there is deviation from random mating depending on MHC  
341 variation. We found haplotype C was disfavoured in comparison with random expectation in  
342 both consort males and fathers. We found no evidence that MHC heterozygotes were  
343 favoured in either sex. Instead, we found MHC homozygote females were over-represented in  
344 consort pairs but this pattern was not observed in actual mothers. We found the average  
345 number of shared MHC haplotypes between parents was lower compared with null  
346 expectation, but this pattern was not observed in the consort dataset. In addition, the  
347 proportion of parent pairs sharing no haplotype was higher and that of parent pairs sharing  
348 one haplotype was lower than expected under random mating. Finally, we found evidence of  
349 inbreeding avoidance, as the mean and median pairwise genomic relatedness in the consort  
350 and observed parentage datasets were significantly lower than expected under random  
351 mating. When fitting MHC and genomic effects in the same model of consort or parentage,

352 we could not demonstrate an independent effect of disassortative mating based on MHC  
353 haplotype sharing, but we found the deviation towards MHC homozygote females in the  
354 consort data was independent of genome-wide heterozygosity.

355 In our study, sexual selection on a specific MHC haplotype (C) was probably due to  
356 differences in male competitive ability, since the frequency of C was rarer than expected, not  
357 only in male parents but also in consort males. Few previous studies have reported specific  
358 MHC variants being favoured or disfavoured during mating as the high polymorphism of  
359 MHC genes requires a large sample size to detect sexual selection on specific MHC variants  
360 (Eizaguirre, Yeates et al. 2009). In this study, our finding for haplotype C in male parents was  
361 consistent with a negative association between MHC haplotype C and male breeding success  
362 found in a recent study on MHC-fitness associations (Huang, Dicks et al. 2020). The fact that  
363 haplotype C males are also less often observed in consort than expected indicates that the  
364 effect of haplotype C is expressed at the pre-copulatory rather than post-copulatory stage.

365 Our finding that females observed in consorts are more homozygous than expected, an effect  
366 which is opposite to expectation, is not found in the observed parentage data and is  
367 independent of genome-wide heterozygosity, is puzzling and requires explanation. One  
368 hypothesis is that MHC-homozygous females are less likely to conceive in a given oestrus  
369 cycle and therefore return to oestrus 14 days later. This in turn would enrich our consort data  
370 set for such females. Alternatively, if homozygous females are less attractive in some way,  
371 perhaps they are less likely to be in long, stable consorts and instead experience multiple  
372 short consorts, which would again enrich the consort data set for homozygous females. These  
373 possibilities require further investigation within our dataset but are beyond the scope of this  
374 paper.

375 At first sight, our results also suggest that there is sexual selection based on MHC  
376 compatibility, but our tests suggest this effect is not independent of an inbreeding avoidance  
377 effect. In a population with limited dispersal and severe inbreeding depression, inbreeding  
378 avoidance through kin recognition could arise to reduce the cost of inbreeding (Pusey and  
379 Wolf 1996, Szulkin, Stopher et al. 2013, Duthie and Reid 2016). Previous studies have  
380 proposed MHC variation could be used as a cue for inbreeding avoidance and MHC-  
381 associated odour variation has been reported in a wide range of taxa including fish (Olsen,  
382 Grahn et al. 1998, Milinski, Griffiths et al. 2005), reptiles (Olsson, Madsen et al. 2003), birds  
383 (Leclaire, Strandh et al. 2017) and mammals (Wedekind, Seebeck et al. 1995, Wedekind and  
384 Furi 1997, Yamazaki, Beauchamp et al. 2000, Roberts, Gosling et al. 2008). However, if  
385 MHC haplotype sharing is associated with relatedness, as we have shown in Soay sheep,  
386 MHC-disassortative mating could be a by-product of inbreeding avoidance. Few studies have  
387 been able to test this hypothesis, however a study of grey mouse lemur revealed both  
388 inbreeding avoidance and MHC-dependent disassortative mating, and suggested that  
389 observed deviations from random mating at the MHC are driven by the functionally  
390 important MHC gene DRB rather than resulting passively from inbreeding avoidance. In that  
391 study, MHC-dependent disassortative mating was detected at the DRB locus only for amino  
392 acid sequence and functional similarity rather than number of shared MHC alleles (Huchard,  
393 Baniel et al. 2013). In contrast, when studied in terms of MHC divergence measured as amino  
394 acid sequence differences between parents in Soay sheep, our results were in line with the  
395 expectation from random mating (Figure 2g and h). In Soay sheep, inbreeding depression has  
396 been documented repeatedly using different approaches (Coltman, Pilkington et al. 1999,  
397 Overall, Byrne et al. 2005, Berenos, Ellis et al. 2016, Stoffel, Johnston et al. 2020), so it is  
398 possible the sheep have evolved inbreeding avoidance. Using genomic relatedness calculated  
399 from a large number of SNPs, we demonstrated genomic inbreeding avoidance in Soays at

400 the pre-copulatory stage for the first time. When tested in the same model, MHC haplotype  
401 sharing was not significant. We therefore cannot claim that the apparent disassortative mating  
402 based on haplotype sharing is anything but a correlated effect of inbreeding avoidance.

403 Our results differ from a previous study in Soay sheep (Paterson and Pemberton 1997) which  
404 found no evidence for MHC-dependent assortative or disassortative mating. In the current  
405 study, we found evidence of MHC-dependent disassortative mating, at the post-copulatory  
406 stage which carried through to the parentage stage, based on the number of shared MHC  
407 haplotypes. Reasons for this difference include the fact our data consisted of MHC class II  
408 haplotypes rather than MHC-linked microsatellite markers, and these two approaches do not  
409 have a perfect read through. Also, our sample sizes are very much larger and our  
410 methodology (Monte Carlo simulation) is different from the previous study which used a  
411 likelihood-based approach.

412 By using a large number of consort observations, we were able to differentiate MHC-  
413 dependent sexual selection at the pre- and post-copulatory stages. In this area, field  
414 observations were first used in a study of mouse lemur which demonstrated post-copulatory  
415 MHC-dependent disassortative mating (Schwensow, Eberle et al. 2008). Here, we used both  
416 the consort and the observed parentage datasets to examine MHC-dependent sexual selection.  
417 We found sexual selection against a specific MHC haplotype at pre-copulatory stage and  
418 sexual selection favouring MHC compatibility at the post-copulatory stage. Interestingly, we  
419 found that the ratio of homozygote:heterozygote was significantly higher in consort females  
420 than the simulated results but this pattern were not observed in mothers. These results  
421 indicate the value of using field observations to differentiate pre- and post-copulatory sexual  
422 selection.

423 In this study, we examined whether there was MHC-dependent sexual selection in a  
424 population of free-living Soay sheep. Benefiting from intermediate MHC polymorphism,  
425 high quality genetic and genomic information, intensive field observations and large sample  
426 size, we have demonstrated sexual selection based on a specific MHC haplotype at the pre-  
427 copulatory stage and MHC compatibility at the post-copulatory stage occurs simultaneously.  
428 We have also demonstrated sexual selection against female MHC heterozygosity in  
429 dependent of genome-wide heterozygosity during the rut. Finally, we report inbreeding  
430 avoidance in this population for the first time and find that we cannot show an independent  
431 effect of disassortative mating based on the MHC. Our results suggest that multiple  
432 mechanisms of MHC-dependent sexual selection could act simultaneously in Soay sheep and  
433 that it is necessary to have an exhaustive examination of all possible mechanisms when  
434 investigating MHC-dependent sexual selection.

## 435 **Acknowledgements**

436 We thank the National Trust for Scotland for permission to work on St. Kilda and QinetiQ,  
437 Eurest and Kilda Cruises for logistics and support. We thank I. Stevenson and many  
438 volunteers who have collected field data and samples, especially in the rut, and all those who  
439 have contributed to keeping the project going. The MHC diplotyping method and the  
440 diplotype data set were developed and generated by Kara Dicks and Susan Johnston. SNP  
441 genotyping was conducted at the Wellcome Trust Clinical Research Facility Genetics Core.  
442 Field data collection has been supported by NERC (NE/M002896/1) over many years, the  
443 diplotyping was supported by the BBSRC and Royal Society and most of the SNP  
444 genotyping was supported by the European Research Council (AdG 250098). Wei Huang is  
445 supported by Edinburgh Global research scholarship.

## 446 **Data Accessibility and Benefit-Sharing Statement**

447 All the data and R script of this manuscript are available through the following link:  
448 [https://figshare.com/articles/dataset/MHC-sexual\\_selection-St\\_Kilda\\_Soay\\_sheep/13277081](https://figshare.com/articles/dataset/MHC-sexual_selection-St_Kilda_Soay_sheep/13277081)

449

## 450 **Author contribution**

451 W.H and J.M.P designed the study. J.G.P conducted the field observations. W.H analysed the  
452 data and wrote the manuscript. All the authors contributed to the final version of the  
453 manuscript.

454

## 455 **References**

- 456 Berenos, C., P. A. Ellis, J. G. Pilkington and J. M. Pemberton (2014). "Estimating quantitative genetic  
457 parameters in wild populations: a comparison of pedigree and genomic approaches." Molecular  
458 Ecology **23**(14): 3434-3451.
- 459 Berenos, C., P. A. Ellis, J. G. Pilkington and J. M. Pemberton (2016). "Genomic analysis reveals  
460 depression due to both individual and maternal inbreeding in a free-living mammal population."  
461 Molecular Ecology **25**(13): 3152-3168.
- 462 Bichet, C., D. J. Penn, Y. Moodley, L. Dunoyer, E. Cellier-Holzem, M. Belvalette, A. Gregoire, S. Garnier  
463 and G. Sorci (2014). "Females tend to prefer genetically similar mates in an island population of  
464 house sparrows." Bmc Evolutionary Biology **14**.
- 465 Bonneaud, C., O. Chastel, P. Federici, H. Westerdahl and G. Sorci (2006). "Complex Mhc-based mate  
466 choice in a wild passerine." Proceedings of the Royal Society B-Biological Sciences **273**(1590): 1111-  
467 1116.
- 468 Canela-Xandri, O., A. Law, A. Gray, J. A. Woolliams and A. Tenesa (2015). "A new tool called DISSECT  
469 for analysing large genomic data sets using a Big Data approach." Nature Communications **6**.
- 470 Clutton-Brock, T. H. and J. M. Pemberton (2004). Soay sheep: dynamics and selection in an island  
471 population, Cambridge University Press.
- 472 Coltman, D. W., J. G. Pilkington, J. A. Smith and J. M. Pemberton (1999). "Parasite-mediated selection  
473 against inbred Soay sheep in a free-living, island population." Evolution **53**(4): 1259-1267.
- 474 Cutrera, A. P., M. S. Fanjul and R. R. Zenuto (2012). "Females prefer good genes: MHC-associated  
475 mate choice in wild and captive tuco-tucos." Animal Behaviour **83**(3): 847-856.
- 476 Dicks, K. L., J. M. Pemberton and K. T. Ballingall (2019). "Characterisation of major histocompatibility  
477 complex class IIa haplotypes in an island sheep population." Immunogenetics **71**(5-6): 383-393.
- 478 Dicks, K. L., J. M. Pemberton, K. T. Ballingall and S. E. Johnston (2020). "Haplotyping MHC class IIa by  
479 high throughput screening in an isolated sheep population." bioRxiv: 2020.2007.2020.212225.
- 480 Duthie, A. B. and J. M. Reid (2016). "Evolution of Inbreeding Avoidance and Inbreeding Preference  
481 through Mate Choice among Interacting Relatives." American Naturalist **188**(6): 651-667.
- 482 Eizaguirre, C., S. E. Yeates, T. L. Lenz, M. Kalbe and M. Milinski (2009). "MHC-based mate choice  
483 combines good genes and maintenance of MHC polymorphism." Molecular Ecology **18**(15): 3316-  
484 3329.
- 485 Ejsmond, M. J., J. Radwan and A. B. Wilson (2014). "Sexual selection and the evolutionary dynamics  
486 of the major histocompatibility complex." Proceedings of the Royal Society B-Biological Sciences  
487 **281**(1796).
- 488 Ekblom, R., S. A. Saether, M. Grahn, P. Fiske, J. A. Kalas and J. Hoglund (2004). "Major  
489 histocompatibility complex variation and mate choice in a lekking bird, the great snipe (*Gallinago*  
490 *media*)." Molecular Ecology **13**(12): 3821-3828.
- 491 Ferrandiz-Rovira, M., D. Allaine, M. P. Callait-Cardinal and A. Cohas (2016). "Mate choice for neutral  
492 and MHC genetic characteristics in Alpine marmots: different targets in different contexts?" Ecology  
493 and Evolution **6**(13): 4243-4257.
- 494 Gagher, A., R. Burri, W. H. Gharib, P. Taberlet, A. Roulin and L. Fumagalli (2016). "Family-assisted  
495 inference of the genetic architecture of major histocompatibility complex variation." Mol Ecol  
496 Resour **16**(6): 1353-1364.
- 497 Griggio, M., C. Biard, D. J. Penn and H. Hoi (2011). "Female house sparrows "count on" male genes:  
498 experimental evidence for MHC-dependent mate preference in birds." Bmc Evolutionary Biology **11**.
- 499 Grob, B., L. A. Knapp, R. D. Martin and G. Anzenberger (1998). "The major histocompatibility  
500 complex and mate choice: Inbreeding avoidance and selection of good genes." Experimental and  
501 Clinical Immunogenetics **15**(3): 119-129.
- 502 Han, Q. H., R. N. Sun, H. Q. Yang, Z. W. Wang, Q. H. Wan and S. G. Fang (2019). "MHC class I diversity  
503 predicts non-random mating in Chinese alligators (*Alligator sinensis*)." Heredity **122**(6): 809-818.

504 Hayward, A. D., D. H. Nussey, A. J. Wilson, C. Berenos, J. G. Pilkington, K. A. Watt, J. M. Pemberton  
505 and A. L. Graham (2014). "Natural Selection on Individual Variation in Tolerance of Gastrointestinal  
506 Nematode Infection." *Plos Biology* 12(7).

507 Hayward, A. D., A. J. Wilson, J. G. Pilkington, T. H. Clutton-Brock, J. M. Pemberton and L. E. B. Kruuk  
508 (2011). "Natural selection on a measure of parasite resistance varies across ages and environmental  
509 conditions in a wild mammal." *Journal of Evolutionary Biology* 24(8): 1664-1676.

510 Henikoff, S. (1996). "Scores for sequence searches and alignments." *Current Opinion in Structural*  
511 *Biology* 6(3): 353-360.

512 Hoover, B., M. Alcaide, S. Jennings, S. Y. W. Sin, S. V. Edwards and G. A. Nevitt (2018). "Ecology can  
513 inform genetics: Disassortative mating contributes to MHC polymorphism in Leach's storm-petrels  
514 (*Oceanodroma leucorhoa*)." *Mol Ecol.*

515 Hoover, B. and G. Nevitt (2016). "Modeling the Importance of Sample Size in Relation to Error in  
516 MHC-Based Mate-Choice Studies on Natural Populations." *Integrative and Comparative Biology*  
517 *56(5)*: 925-933.

518 Huang, W., K. L. Dicks, J. D. Hadfield, S. E. Johnston, K. T. Ballingall and J. M. Pemberton (2020). "A  
519 rare MHC haplotype confers selective advantage in a free-living ruminant." *bioRxiv*:  
520 2020.2003.2025.008565.

521 Huchard, E., A. Baniel, S. Schliehe-Diecks and P. M. Kappeler (2013). "MHC-disassortative mate  
522 choice and inbreeding avoidance in a solitary primate." *Molecular Ecology* 22(15): 4071-4086.

523 Huchard, E., L. A. Knapp, J. Wang, M. Raymond and G. Cowlshaw (2010). "MHC, mate choice and  
524 heterozygote advantage in a wild social primate." *Mol Ecol* 19(12): 2545-2561.

525 Huchard, E., M. Weill, G. Cowlshaw, M. Raymond and L. A. Knapp (2008). "Polymorphism, haplotype  
526 composition, and selection in the Mhc-DRB of wild baboons." *Immunogenetics* 60(10): 585-598.

527 Huisman, J. (2017). "Pedigree reconstruction from SNP data: parentage assignment, sibship  
528 clustering and beyond." *Molecular Ecology Resources* 17(5): 1009-1024.

529 Hurst, J. L., M. D. Thom, C. M. Nevison, R. E. Humphries and R. J. Beynon (2005). "MHC odours are  
530 not required or sufficient for recognition of individual scent owners." *Proceedings of the Royal*  
531 *Society B-Biological Sciences* 272(1564): 715-724.

532 Jordan, W. C. and M. W. Bruford (1998). "New perspectives on mate choice and the MHC." *Heredity*  
533 *81*: 239-245.

534 Kamiya, T., K. O'Dwyer, H. Westerdahl, A. Senior and S. Nakagawa (2014). "A quantitative review of  
535 MHC-based mating preference: the role of diversity and dissimilarity." *Molecular Ecology* 23(21):  
536 5151-5163.

537 Landry, C., D. Garant, P. Duchesne and L. Bernatchez (2001). "'Good genes as heterozygosity': the  
538 major histocompatibility complex and mate choice in Atlantic salmon (*Salmo salar*)." *Proceedings of*  
539 *the Royal Society B-Biological Sciences* 268(1473): 1279-1285.

540 Leclaire, S., M. Strandh, J. Mardon, H. Westerdahl and F. Bonadonna (2017). "Odour-based  
541 discrimination of similarity at the major histocompatibility complex in birds." *Proceedings of the*  
542 *Royal Society B-Biological Sciences* 284(1846).

543 Lenz, T. L., B. Mueller, F. Trillmich and J. B. W. Wolf (2013). "Divergent allele advantage at MHC-DRB  
544 through direct and maternal genotypic effects and its consequences for allele pool composition and  
545 mating." *Proceedings of the Royal Society B-Biological Sciences* 280(1762).

546 Migalska, M., A. Sebastian and J. Radwan (2019). "Major histocompatibility complex class I diversity  
547 limits the repertoire of T cell receptors." *Proc Natl Acad Sci U S A* 116(11): 5021-5026.

548 Milinski, M. (2006). "The major histocompatibility complex, sexual selection, and mate choice." *Annual Review of Ecology Evolution and Systematics* 37: 159-186.

549 Milinski, M., S. Griffiths, K. M. Wegner, T. B. H. Reusch, A. Haas-Assenbaum and T. Boehm (2005).  
550 "Mate choice decisions of stickleback females predictably modified by MHC peptide ligands."  
551 *Proceedings of the National Academy of Sciences of the United States of America* 102(12): 4414-  
552 4418.



554 Niskanen, A. K., L. J. Kennedy, M. Ruokonen, I. Kojola, H. Lohi, M. Isomursu, E. Jansson, T. Pyhajarvi  
555 and J. Aspi (2014). "Balancing selection and heterozygote advantage in major histocompatibility  
556 complex loci of the bottlenecked Finnish wolf population." Mol Ecol **23**(4): 875-889.  
557 Olsen, K. H., M. Grahn, J. Lohm and A. Langefors (1998). "MHC and kin discrimination in juvenile  
558 Arctic charr, *Salvelinus alpinus* (L.)." Animal Behaviour **56**: 319-327.  
559 Olsson, M., T. Madsen, J. Nordby, E. Wapstra, B. Ujvari and H. Wittsell (2003). "Major  
560 histocompatibility complex and mate choice in sand lizards." Proceedings of the Royal Society B-  
561 Biological Sciences **270**: S254-S256.  
562 Overall, A. D. J., K. A. Byrne, J. G. Pilkington and J. M. Pemberton (2005). "Heterozygosity, inbreeding  
563 and neonatal traits in Soay sheep on St Kilda." Molecular Ecology **14**(11): 3383-3393.  
564 Paterson, S. and J. M. Pemberton (1997). "No evidence for major histocompatibility complex-  
565 dependent mating patterns in a free-living ruminant population." Proceedings of the Royal Society B-  
566 Biological Sciences **264**(1389): 1813-1819.  
567 Penn, D. J. (2002). "The scent of genetic compatibility: Sexual selection and the major  
568 histocompatibility complex." Ethology **108**(1): 1-21.  
569 Pierini, F. and T. L. Lenz (2018). "Divergent Allele Advantage at Human MHC Genes: Signatures of  
570 Past and Ongoing Selection." Mol Biol Evol **35**(9): 2145-2158.  
571 Preston, B. T., I. R. Stevenson, J. M. Pemberton, D. W. Coltman and K. Wilson (2003). "Overt and  
572 covert competition in a promiscuous mammal: the importance of weaponry and testes size to male  
573 reproductive success." Proceedings of the Royal Society B-Biological Sciences **270**(1515): 633-640.  
574 Preston, B. T., I. R. Stevenson, J. M. Pemberton, D. W. Coltman and K. Wilson (2005). "Male mate  
575 choice influences female promiscuity in Soay sheep." Proceedings of the Royal Society B-Biological  
576 Sciences **272**(1561): 365-373.  
577 Pusey, A. and M. Wolf (1996). "Inbreeding avoidance in animals." Trends in Ecology & Evolution  
578 **11**(5): 201-206.  
579 R Core Team (2013). "R: A language and environment for statistical computing. ."  
580 Radwan, J., W. Babik, J. Kaufman, T. L. Lenz and J. Winternitz (2020). "Advances in the Evolutionary  
581 Understanding of MHC Polymorphism." Trends in Genetics **36**(4): 298-311.  
582 Rekdal, S. L., J. A. Anmarkrud, J. T. Lifjeld and A. Johnsen (2019). "Extra-pair mating in a passerine  
583 bird with highly duplicated major histocompatibility complex class II: Preference for the golden  
584 mean." Molecular Ecology **28**(23): 5133-5144.  
585 Reusch, T. B. H., M. A. Haberli, P. B. Aeschlimann and M. Milinski (2001). "Female sticklebacks count  
586 alleles in a strategy of sexual selection explaining MHC polymorphism." Nature **414**(6861): 300-302.  
587 Richardson, D. S., J. Komdeur, T. Burke and T. von Schantz (2005). "MHC-based patterns of social and  
588 extra-pair mate choice in the Seychelles warbler." Proceedings of the Royal Society B-Biological  
589 Sciences **272**(1564): 759-767.  
590 Roberts, S. C., L. M. Gosling, V. Carter and M. Petrie (2008). "MHC-correlated odour preferences in  
591 humans and the use of oral contraceptives." Proceedings of the Royal Society B-Biological Sciences  
592 **275**(1652): 2715-2722.  
593 Schwensow, N., M. Eberle and S. Sommer (2008). "Compatibility counts: MHC-associated mate  
594 choice in a wild promiscuous primate." Proceedings of the Royal Society B-Biological Sciences  
595 **275**(1634): 555-564.  
596 Sepil, I., R. Radersma, A. W. Santure, I. De Cauwer, J. Slate and B. C. Sheldon (2015). "No evidence for  
597 MHC class I-based disassortative mating in a wild population of great tits." Journal of Evolutionary  
598 Biology **28**(3): 642-654.  
599 Setchell, J. M., M. J. E. Charpentier, K. M. Abbott, E. J. Wickings and L. A. Knapp (2010). "Opposites  
600 attract: MHC-associated mate choice in a polygynous primate." Journal of Evolutionary Biology  
601 **23**(1): 136-148.  
602 Sherborne, A. L., M. D. Thom, S. Paterson, F. Jury, W. E. R. Ollier, P. Stockley, R. J. Beynon and J. L.  
603 Hurst (2007). "The genetic basis of inbreeding avoidance in house mice." Current Biology **17**(23):  
604 2061-2066.

- 605 Sin, Y. W., G. Annavi, H. L. Dugdale, C. Newman, T. Burke and D. W. MacDonald (2014). "Pathogen  
606 burden, co-infection and major histocompatibility complex variability in the European badger (*Meles  
607 meles*)."  
Mol Ecol **23**(20): 5072-5088.
- 608 Sin, Y. W., G. Annavi, C. Newman, C. Buesching, T. Burke, D. W. Macdonald and H. L. Dugdale (2015).  
609 "MHC class II-assortative mate choice in European badgers (*Meles meles*)."  
Molecular Ecology  
610 **24**(12): 3138-3150.
- 611 Sin, Y. W., G. Annavi, C. Newman, C. Buesching, T. Burke, D. W. Macdonald and H. L. Dugdale (2015).  
612 "MHC class II-assortative mate choice in European badgers (*Meles meles*)."  
Mol Ecol **24**(12): 3138-  
613 3150.
- 614 Stoffel, M. A., S. E. Johnston, J. G. Pilkington and J. M. Pemberton (2020). "Genetic architecture and  
615 lifetime dynamics of inbreeding depression in a wild mammal." bioRxiv.
- 616 Szulkin, M., K. V. Stopher, J. M. Pemberton and J. M. Reid (2013). "Inbreeding avoidance, tolerance,  
617 or preference in animals?" Trends in Ecology & Evolution **28**(4): 205-211.
- 618 Wakeland, E. K., S. Boehme, J. X. She, C. C. Lu, R. A. McIndoe, I. Cheng, Y. Ye and W. K. Potts (1990).  
619 "Ancestral polymorphisms of MHC class II genes: divergent allele advantage." Immunol Res **9**(2):  
620 115-122.
- 621 Wedekind, C. and S. Furi (1997). "Body odour preferences in men and women: do they aim for  
622 specific MHC combinations or simply heterozygosity?" Proceedings of the Royal Society B-Biological  
623 Sciences **264**(1387): 1471-1479.
- 624 Wedekind, C., T. Seebeck, F. Bettens and A. J. Paepke (1995). "MHC-dependent mate preferences in  
625 humans." Proc Biol Sci **260**(1359): 245-249.
- 626 Westerdahl, H. (2004). "No evidence of an MHC-based female mating preference in great reed  
627 warblers." Molecular Ecology **13**(8): 2465-2470.
- 628 Winternitz, J., J. L. Abbate, E. Huchard, J. Havlicek and L. Z. Garamszegi (2017). "Patterns of MHC-  
629 dependent mate selection in humans and nonhuman primates: a meta-analysis." Mol Ecol **26**(2):  
630 668-688.
- 631 Winternitz, J. C., S. G. Minchey, L. Z. Garamszegi, S. Huang, P. R. Stephens and S. Altizer (2013).  
632 "Sexual selection explains more functional variation in the mammalian major histocompatibility  
633 complex than parasitism." Proceedings of the Royal Society B-Biological Sciences **280**(1769).
- 634 Winternitz, J. C., M. Promerova, R. Polakova, M. Vinkler, J. Schnitzer, P. Munclinger, W. Babik, J.  
635 Radwan, J. Bryja and T. Albrecht (2015). "Effects of heterozygosity and MHC diversity on patterns of  
636 extra-pair paternity in the socially monogamous scarlet rosefinch." Behavioral Ecology and  
637 Sociobiology **69**(3): 459-469.
- 638 Yamazaki, K., G. K. Beauchamp, M. Curran, J. Bard and E. A. Boyse (2000). "Parent-progeny  
639 recognition as a function of MHC odortype identity." Proceedings of the National Academy of  
640 Sciences of the United States of America **97**(19): 10500-10502.
- 641 Yang, J., S. H. Lee, M. E. Goddard and P. M. Visscher (2011). "GCTA: a tool for genome-wide complex  
642 trait analysis." Am J Hum Genet **88**(1): 76-82.
- 643 Yeates, S. E., S. Einum, I. A. Fleming, H. J. Megens, R. J. M. Stet, K. Hindar, W. V. Holt, K. J. W. Van  
644 Look and M. J. G. Gage (2009). "Atlantic salmon eggs favour sperm in competition that have similar  
645 major histocompatibility alleles." Proceedings of the Royal Society B-Biological Sciences **276**(1656):  
646 559-566.
- 647 Yu, L. J., Y. G. Nie, L. Yan, Y. B. Hu and F. W. Wei (2018). "No evidence for MHC-based mate choice in  
648 wild giant pandas." Ecology and Evolution **8**(17): 8642-8651.
- 649
